# Supplementary figures and images for: Retroelement-Linked H3K4me1 Histone Tags Uncover Regulatory Evolution Trends of Gene Enhancers and Feature Quickly Evolving Molecular Processes in Human Physiology
Source: MDPI journal article supplement (doi:10.3390/cells8101219), 2019-10-08

# Data analysis pipeline

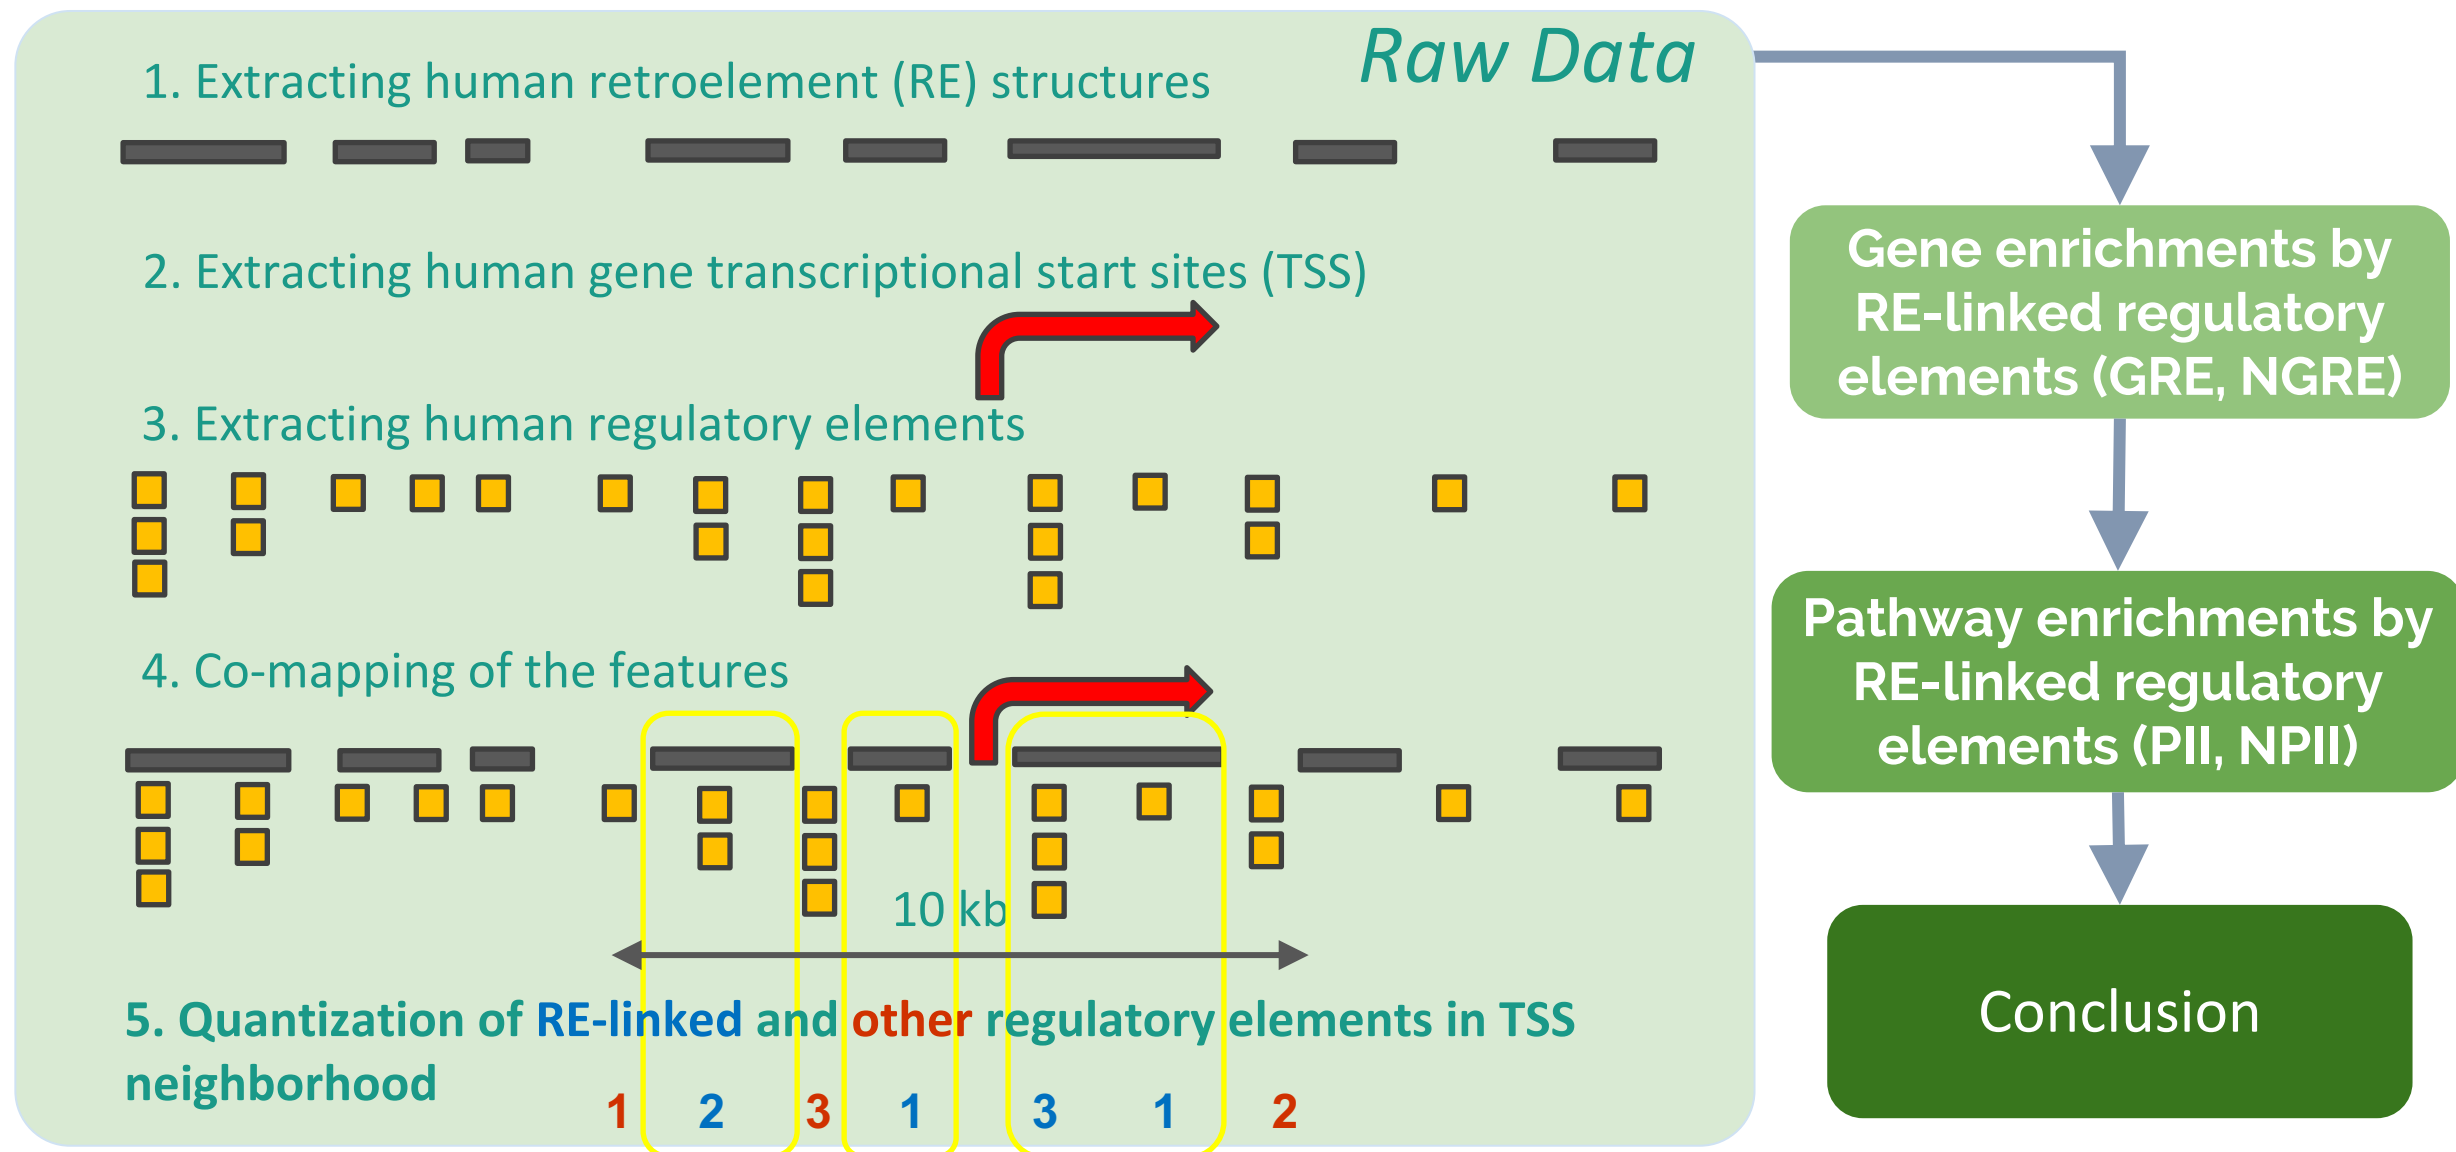

Supplement: s1 [file s1]
